# Supplementary material for: Identification of novel 3-nitroacridines as autophagy inducers in gastric cancer cells
Source: Royal Society of Chemistry journal article supplement (doi:10.1039/c7nj00119c), 2017-01-01
Supplement: c7nj00119c1.pdf [file c7nj00119c1.pdf]

## Supplementary information

### Identification of novel 3-nitroacridines as autophagy inducers in gastric cancer cells

Jia Yu,<sup>a</sup> Xiaoqing Zhao,<sup>b</sup> Nanmengzi Zhang,<sup>b</sup> Chaoqun You,<sup>a</sup> Gang Yao,<sup>b</sup> Jin Zhu,<sup>c</sup> Liang Xu<sup>d</sup> and  
Baiwang Sun<sup>a\*</sup>

<sup>a</sup>School of Chemistry and Chemical Engineering, Southeast University, Nanjing 210089, China

<sup>b</sup>Department of Chemical and Pharmaceutical Engineering, Southeast University Chenxian  
College, Nanjing 210000, China

<sup>c</sup>Key Laboratory of Antibody Technique of Ministry of Health, School of Pathology, Nanjing  
Medical University, Nanjing 210093, China

<sup>d</sup>Department of Molecular Biosciences, The University of Kansas, Lawrence, Kansas 66045, USA

Correspondence: E-mail: [chmsunbw@seu.edu.cn](mailto:chmsunbw@seu.edu.cn); Phone/fax: +86-25-52090614

Submitted for NJC

## 1. Figures

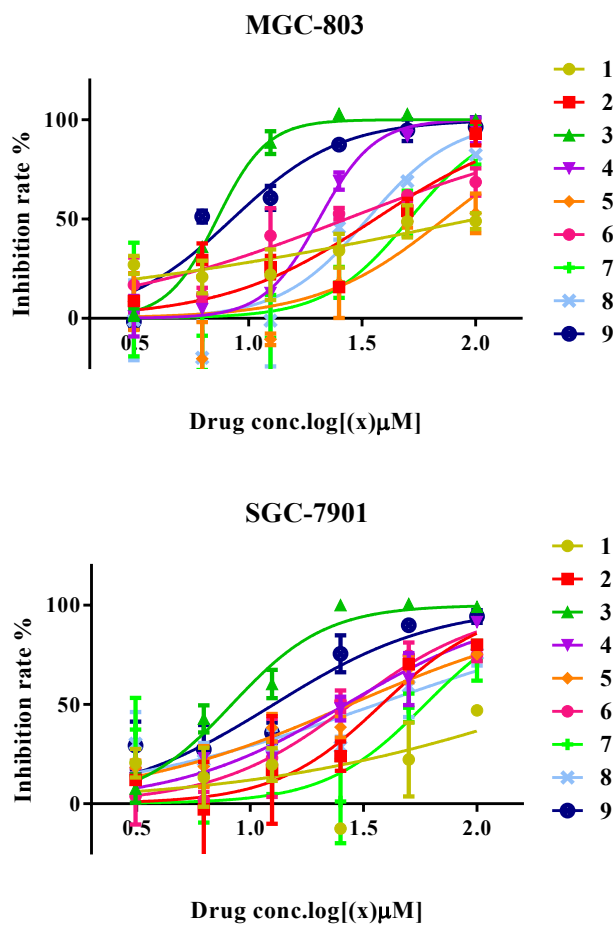

**Figure S1.** MTT-based cell growth inhibition assay of compounds in human gastric cancer cell lines (n≥3).
